# Supplementary material for: On the Diffusion of Ionic Liquids in ILs@ZIF-8 Composite Materials: A Density Functional Theory Study
Source: MDPI journal article supplement (doi:10.3390/molecules29081697), 2024-04-09
Supplement: s1 [file s1]

## Supporting Information

### **On the diffusion of ionic liquids in ILs@ZIF-8 composite materials: a density functional theory study**

Longlong Liu,<sup>a</sup> Kun Jiang,<sup>a</sup> Qingjun Chen,<sup>b</sup> Lei Liu<sup>a\*</sup>

<sup>a</sup> Center for Computational Chemistry, College of Chemistry and Chemical Engineering, Wuhan Textile University, Wuhan, 430200 P. R. China

<sup>b</sup> Key Laboratory of Rare Earths, Ganjiang Innovation Academy, Chinese Academy of Sciences, Ganzhou 341000, China

Corresponding author:

Lei Liu, liulei3039@gmail.com; liulei@wtu.edu

**Figure S1** Three different ways and their diameters of the  $[\text{PF}_6]^-$  pathing through the ZIF-8 pore.

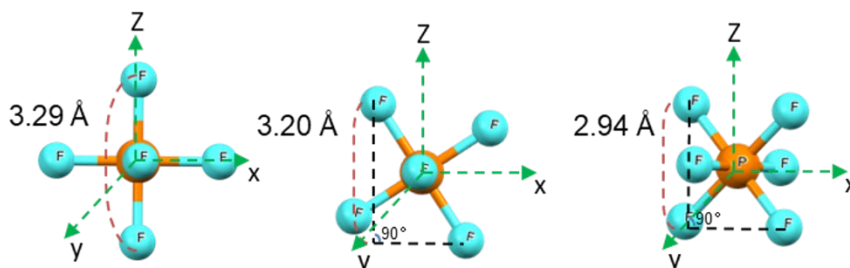

**Figure S2.** Interaction energy components calculated using the GKS-EDA method at the B3LYP-D3(BJ)/6-311+G\* level for the different  $[\text{PF}_6]^-$  ways towards the ZIF-8 aperture.

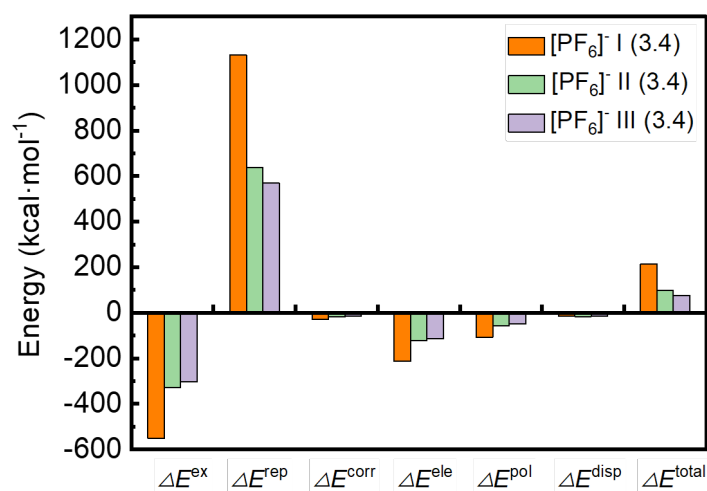

**Figure S3.** The structures for the points with the highest interaction energies in the cases of  $[\text{PF}_6]^-/[\text{C}_4\text{mim}]^+$  and ZIF-8(3.4), respectively, and the average distance refers to the closest distances between the fluorine atom on the  $[\text{PF}_6]^-$ , or the hydrogen atoms on the  $[\text{C}_4\text{mim}]^+$  and the hydrogen atom on the aperture.

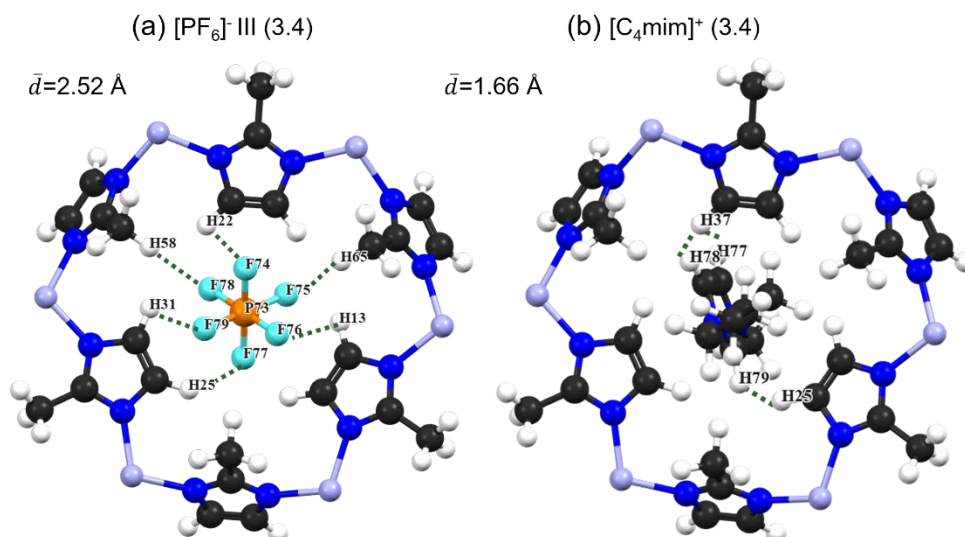

**Table S1.** NPA charge analysis of  $[\text{PF}_6]^-/[\text{C}_4\text{mim}]^+$  and ZIF-8(3.4) at theoretical levels of B3LYP-D3(BJ)/6-311+G\*.(values are in  $e$ )

| System                           | $q(\text{anion})$ | $q(\text{cation})$ | $\Delta q(\text{ZIF-8})$ |
|----------------------------------|-------------------|--------------------|--------------------------|
| $[\text{PF}_6]^-$ III (3.4)      | -0.914            | --                 | -0.086 <sup>a</sup>      |
| $[\text{C}_4\text{mim}]^+$ (3.4) | --                | 0.916              | 0.084 <sup>b</sup>       |

\*The initial charge of the ZIF-8 surface is zero.

$q(\text{anion})$  and  $q(\text{cation})$  is the charge distribution of  $[\text{PF}_6]^-$  and  $[\text{C}_4\text{mim}]^+$  after the NPA charge calculation results, respectively.

<sup>a</sup> $\Delta q(\text{ZIF-8})$  is the sum of the charge distribution in the  $[\text{PF}_6]^-$ -ZIF-8(3.4) system.

<sup>b</sup> $\Delta q(\text{ZIF-8})$  is the sum of the charge distribution in the  $[\text{C}_4\text{mim}]^+$ -ZIF-8(3.4) system.
